# Supplementary material
Source: PubMed Central journal article supplement (PMC6416082)
Supplement: NIHMS1508913-supplement-1.pdf [file NIHMS1508913-supplement-1.pdf]

**Supplementary Figure 1**

**CD39 rs2226163**

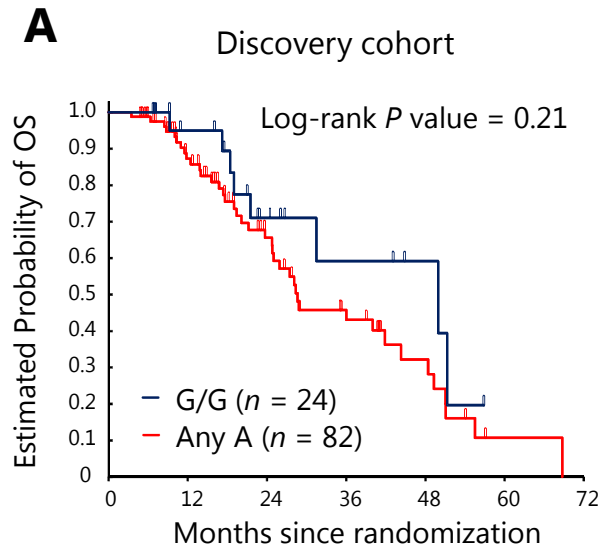

**CD73 rs2229523**

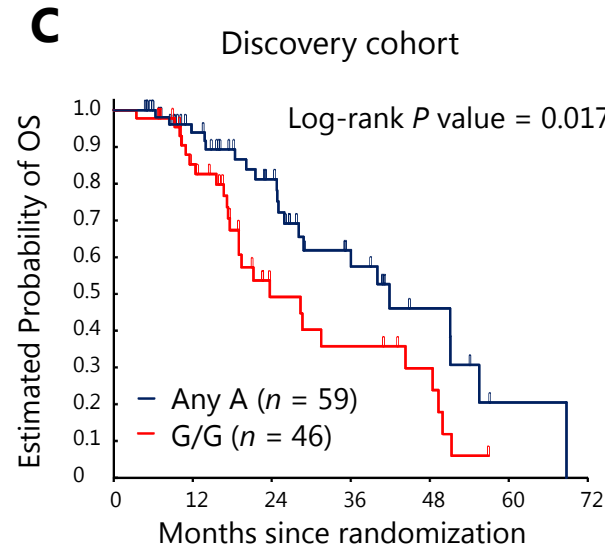

**A2BRrs2015353**

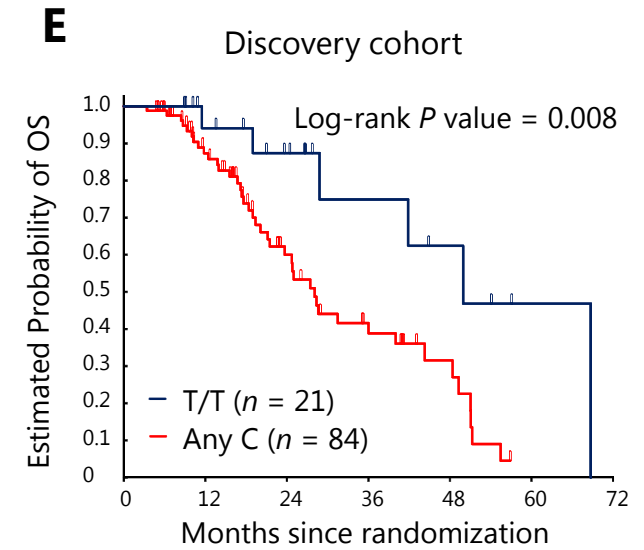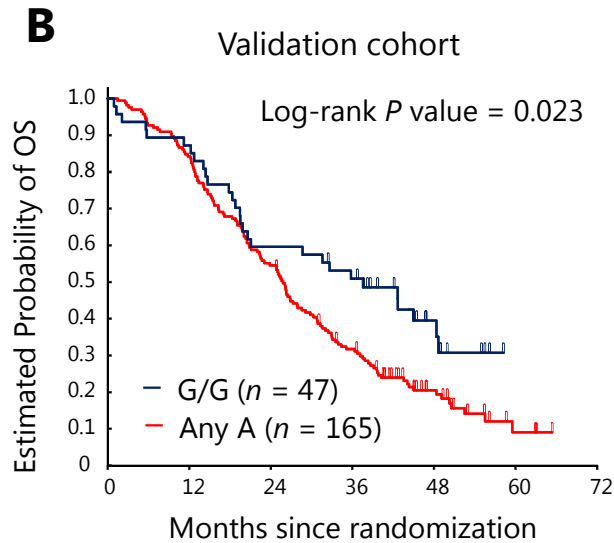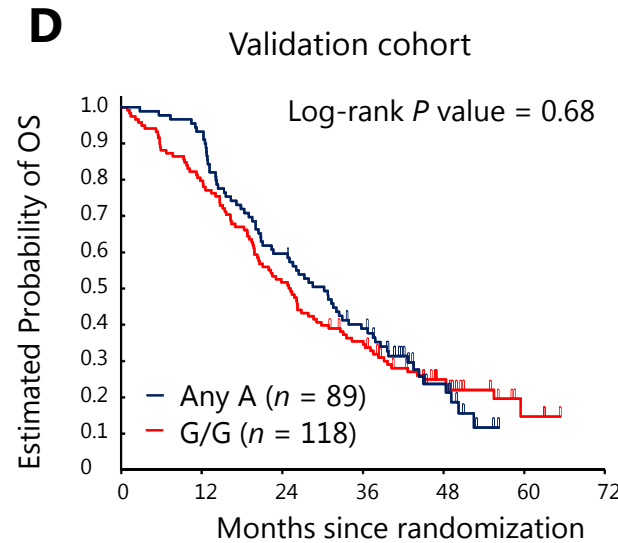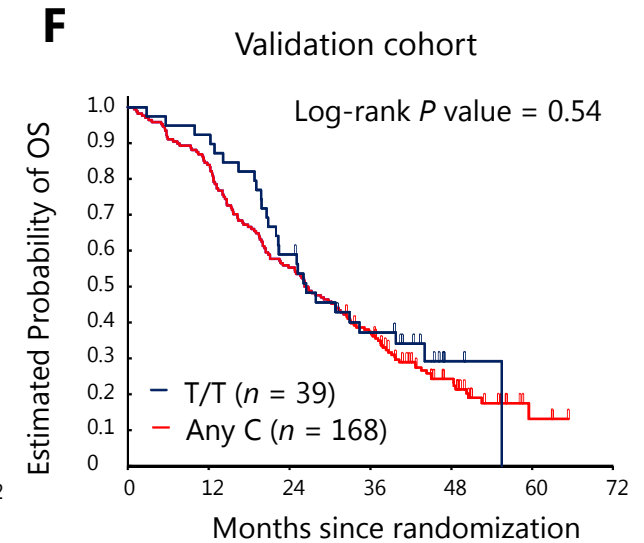

**Supplementary Table 1.** Selected SNPs in adenosine-related molecules and their characteristics

| Adenosin-related molecules | Encoding gene  | Chromosome | SNP (rs number) | Location of the polymorphism | Global MAF | Base exchange | Predictive function or published data           |
|----------------------------|----------------|------------|-----------------|------------------------------|------------|---------------|-------------------------------------------------|
| CD39                       | <i>ENTPD1</i>  | 10         | rs11188513      | 3' UTR                       | 0.4161     | C>T           | Micro RNA binding, Tag SNP                      |
|                            |                |            | rs2226163       | 3' UTR                       | 0.4756     | A>G           | Micro RNA binding, Tag SNP                      |
| CD73                       | <i>NT5E</i>    | 6          | rs2229523       | Exon (missense)              | 0.2067     | A>G           | Changing the protein expression                 |
| A2AR                       | <i>ADORA2A</i> | 22         | rs5751876       | Exon (synonymous)            | 0.4423     | T>C           | Methotrexate response in rheumatoid arthritis   |
| A2BR                       | <i>ADORA2B</i> | 17         | rs2015353       | Exon (missense)              | 0.3712     | T>C           | Tag SNP                                         |
|                            |                |            | rs2057482       | 3' UTR                       | 0.2424     | T>C           | Micro RNA binding, Tag SNP                      |
| HIF-1 $\alpha$             | <i>HIF1A</i>   | 14         | rs11549465      | Exon (missense)              | 0.0731     | C>T           | Increasing the risk of prostate cancer, Tag SNP |

Abbreviations: MAF, minor allele frequency; SNP, single-nucleotide polymorphism; UTR, untranslated region

**Supplementary Table 2.** Comparison of baseline characteristics between FIRE-3 FOLFIRI bevacizumab, TRIBE FOLFIRI bevacizumab, and FIRE-3 FOLFIRI cetuximab arms.

| Patients Characteristics<br><i>n</i> = 451 | Discovery cohort<br>(FIRE-3 FOLFIRI<br>bevacizumab, <i>n</i> = 107) | Validation cohort<br>(TRIBE FOLFIRI<br>bevacizumab, <i>n</i> = 215) | Control cohort<br>(FIRE-3 FOLFIRI<br>cetuximab, <i>n</i> = 129) | <i>P</i> value <sup>a</sup> |
|--------------------------------------------|---------------------------------------------------------------------|---------------------------------------------------------------------|-----------------------------------------------------------------|-----------------------------|
|                                            | <i>n</i> (%)                                                        | <i>n</i> (%)                                                        | <i>n</i> (%)                                                    |                             |
| Sex                                        |                                                                     |                                                                     |                                                                 | 0.013                       |
| Male                                       | 70 (65%)                                                            | 132 (61%)                                                           | 99 (77%)                                                        |                             |
| Female                                     | 37 (35%)                                                            | 83 (39%)                                                            | 30 (23%)                                                        |                             |
| Age                                        |                                                                     |                                                                     |                                                                 | 0.006                       |
| ≤65                                        | 62 (58%)                                                            | 156 (73%)                                                           | 75 (58%)                                                        |                             |
| >65                                        | 45 (42%)                                                            | 59 (27%)                                                            | 54 (42%)                                                        |                             |
| Performance status                         |                                                                     |                                                                     |                                                                 | <0.001                      |
| ECOG 0                                     | 56 (52%)                                                            | 177 (82%)                                                           | 80 (62%)                                                        |                             |
| ECOG 1                                     | 51 (48%)                                                            | 37 (17%)                                                            | 49 (38%)                                                        |                             |
| Unknown <sup>b</sup>                       | 0 (0%)                                                              | 1 (1%)                                                              | 0 (0%)                                                          |                             |
| Tumor location                             |                                                                     |                                                                     |                                                                 | 0.157                       |
| Right side                                 | 25 (23%)                                                            | 53 (25%)                                                            | 22 (17%)                                                        |                             |
| Left side                                  | 81 (76%)                                                            | 147 (68%)                                                           | 105 (81%)                                                       |                             |
| Unknown <sup>b</sup>                       | 1 (1%)                                                              | 15 (7%)                                                             | 2 (2%)                                                          |                             |
| Liver limited disease                      |                                                                     |                                                                     |                                                                 | 0.615                       |
| No                                         | 75 (70%)                                                            | 150 (70%)                                                           | 84 (65%)                                                        |                             |
| Yes                                        | 32 (30%)                                                            | 65 (30%)                                                            | 45 (35%)                                                        |                             |
| Primary tumor resected                     |                                                                     |                                                                     |                                                                 | <0.001                      |
| No                                         | 12 (11%)                                                            | 80 (37%)                                                            | 23 (18%)                                                        |                             |
| Yes                                        | 95 (89%)                                                            | 135 (63%)                                                           | 106 (82%)                                                       |                             |
| Adjuvant chemotherapy                      |                                                                     |                                                                     |                                                                 | 0.131                       |
| No                                         | 86 (80%)                                                            | 188 (87%)                                                           | 103 (80%)                                                       |                             |
| Yes                                        | 21 (20%)                                                            | 27 (13%)                                                            | 25 (19%)                                                        |                             |
| Unknown <sup>b</sup>                       | 0 (0%)                                                              | 0 (0%)                                                              | 1 (1%)                                                          |                             |
| KRAS status                                |                                                                     |                                                                     |                                                                 | <0.001                      |
| Wildtype                                   | 103 (96%)                                                           | 88 (41%)                                                            | 125 (97%)                                                       |                             |
| Mutant                                     | 4 (4%)                                                              | 90 (42%)                                                            | 4 (3%)                                                          |                             |
| Unknown <sup>b</sup>                       | 0 (0%)                                                              | 37 (17%)                                                            | 0 (0%)                                                          |                             |
| RAS status                                 |                                                                     |                                                                     |                                                                 | <0.001                      |
| Wildtype                                   | 66 (62%)                                                            | 50 (23%)                                                            | 83 (64%)                                                        |                             |
| Mutant                                     | 17 (16%)                                                            | 110 (51%)                                                           | 19 (15%)                                                        |                             |
| Unknown <sup>b</sup>                       | 24 (22%)                                                            | 55 (26%)                                                            | 27 (21%)                                                        |                             |
| BRAF status                                |                                                                     |                                                                     |                                                                 | 0.271                       |
| Wildtype                                   | 81 (76%)                                                            | 168 (78%)                                                           | 95 (74%)                                                        |                             |
| Mutant                                     | 4 (4%)                                                              | 10 (5%)                                                             | 7 (5%)                                                          |                             |
| Unknown <sup>b</sup>                       | 22 (21%)                                                            | 37 (17%)                                                            | 27 (21%)                                                        |                             |

<sup>a</sup> *P* value was based on chi-square test for categorical factors.

<sup>b</sup> Unknown group was not included in this analysis.
